# Supplementary material
Source: PubMed Central journal article supplement (PMC8763125)
Supplement: tdscore_manuscript_supplementary_tables_figures_taab139.pdf [file tdscore_manuscript_supplementary_tables_figures_taab139.pdf]

**Supplementary Table 1. Demographic and Disease Classification Characteristics of Participants Enrolled in TrEAT TD**

| <b>Characteristic</b>                               | <b>TrEAT TD<br/>(n = 363)</b> |
|-----------------------------------------------------|-------------------------------|
| <b>Mean age, (std. dev)</b>                         | 29.3 (8.5)                    |
| <b>Gender</b>                                       |                               |
| <b>Male, No. (%)</b>                                | 339 (93.4)                    |
| <b>Female, No. (%)</b>                              | 24 (6.6)                      |
| <b>Race</b>                                         |                               |
| <b>White, No. (%)</b>                               | 302 (83.2)                    |
| <b>Black, No. (%)</b>                               | 34 (9.4)                      |
| <b>Other, No. (%)</b>                               | 27 (7.4)                      |
| <b>Disease Classification</b>                       |                               |
| <b>Acute watery diarrhea, No. (%)</b>               | 317 (87.3)                    |
| <b>Acute dysentery or febrile diarrhea, No. (%)</b> | 46 (12.7)                     |
| <b>Impact on Activity</b>                           |                               |
| <b>Normal, No. (%)</b>                              | 79 (21.5)                     |
| <b>Decreased <math>\leq</math> 50%, No. (%)</b>     | 166 (45.2)                    |
| <b>Decreased <math>&gt;</math> 50%, No. (%)</b>     | 96 (26.2)                     |
| <b>Completely unable to function, No. (%)</b>       | 22 (6.0)                      |

**Supplementary Table 2. Frequency (%) of signs and symptoms in the TrEAT TD Dataset (N=363)**

|          | Cramps | Malaise | Nausea | Vomiting* | Fever** | Tenesmus | Incontinence | Gas  |
|----------|--------|---------|--------|-----------|---------|----------|--------------|------|
| None     | 24.3   | 35.7    | 47.5   | 78.7      | 84.3    | 70.8     | 85.7         | 61.2 |
| Mild     | 29.4   | 23.2    | 30.2   | 5.2       | 5.8     | 14.3     | 5.8          | 16.8 |
| Moderate | 34.9   | 33.0    | 18.7   | 5.7       | 7.2     | 12.9     | 6.3          | 18.5 |
| Severe   | 10.1   | 7.6     | 3.6    | 9.3       | 2.8     | 1.9      | 2.2          | 3.6  |

\*Severity coded as follows: none, no vomiting episodes; mild, 1 episode/24hrs; moderate, 2 episodes/24hrs; severe,  $\geq 3$  episodes/24hrs)

\*\*Severity coded as follows: none,  $<100.4^{\circ}\text{F}$ ; mild,  $100.4^{\circ}\text{F} - 101.1^{\circ}\text{F}$ ; moderate,  $101.2^{\circ}\text{F} - 102.0^{\circ}\text{F}$ ; severe,  $\geq 102.1^{\circ}\text{F}$

# Supplementary Figure 1. Maximum stool output frequency (TrEAT TD)

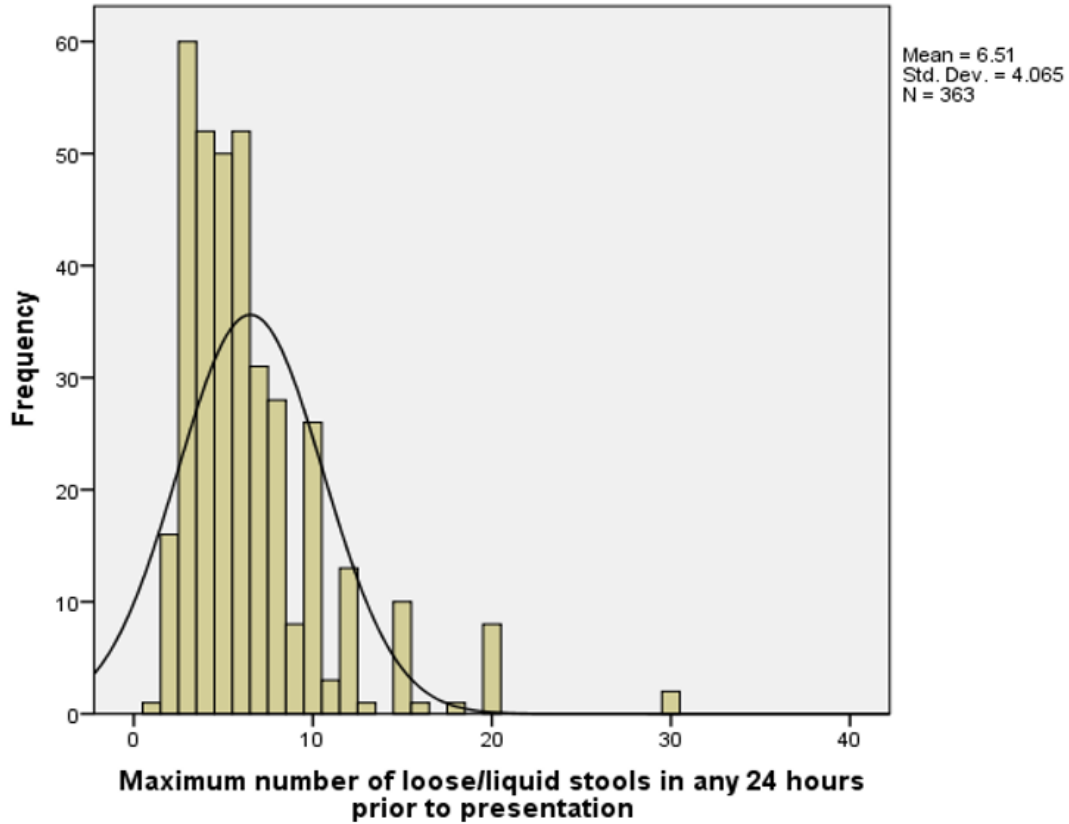

**Supplementary Table 3. Spearman correlations of ordinal signs and symptoms (TrEAT TD Dataset)**

| Signs/Symptoms            |                    | Correlation estimate ( $\rho$ ) | Correlation estimate (p) |       | p-value |
|---------------------------|--------------------|---------------------------------|--------------------------|-------|---------|
|                           |                    |                                 | 95% confidence limits    |       |         |
|                           |                    |                                 | Lower                    | Upper |         |
| <b>Fever</b>              | Vomiting           | 0.24                            | 0.12                     | 0.37  | <0.001  |
|                           | Abdominal Cramps   | 0.12                            | 0.01                     | 0.22  | 0.03    |
|                           | Gas                | -0.04                           | -0.14                    | 0.06  | 0.43    |
|                           | Nausea             | 0.29                            | 0.20                     | 0.38  | <0.001  |
|                           | Tenesmus           | 0.07                            | -0.04                    | 0.19  | 0.16    |
|                           | Malaise/fatigue    | 0.30                            | 0.21                     | 0.38  | <0.001  |
|                           | Fecal Incontinence | 0.06                            | -0.06                    | 0.18  | 0.25    |
| <b>Vomiting</b>           | Abdominal Cramps   | 0.13                            | 0.03                     | 0.23  | 0.011   |
|                           | Gas                | -0.07                           | -0.17                    | 0.04  | 0.188   |
|                           | Nausea             | 0.49                            | 0.40                     | 0.57  | <0.001  |
|                           | Tenesmus           | 0.14                            | 0.03                     | 0.25  | 0.007   |
|                           | Malaise/fatigue    | 0.34                            | 0.25                     | 0.42  | <0.001  |
|                           | Fecal Incontinence | 0.08                            | -0.03                    | 0.12  | 0.15    |
|                           | Fever              | 0.24                            | 0.12                     | 0.37  | <0.001  |
| <b>Abdominal Cramps</b>   | Gas                | 0.14                            | 0.04                     | 0.24  | 0.007   |
|                           | Nausea             | 0.25                            | 0.14                     | 0.35  | <0.001  |
|                           | Tenesmus           | 0.21                            | 0.11                     | 0.30  | <0.001  |
|                           | Malaise/fatigue    | 0.31                            | 0.22                     | 0.41  | <0.001  |
|                           | Fecal Incontinence | 0.14                            | 0.04                     | 0.23  | 0.007   |
|                           | Fever              | 0.12                            | 0.01                     | 0.22  | 0.03    |
|                           | Vomiting           | 0.13                            | 0.03                     | 0.23  | 0.01    |
| <b>Gas</b>                | Nausea             | 0.37                            | -0.07                    | 0.14  | 0.48    |
|                           | Tenesmus           | 0.12                            | 0.002                    | 0.23  | 0.32    |
|                           | Malaise/fatigue    | 0.13                            | 0.03                     | 0.24  | 0.01    |
|                           | Fecal Incontinence | 0.04                            | -0.06                    | 0.14  | 0.45    |
|                           | Fever              | -0.42                           | -0.14                    | 0.06  | 0.43    |
|                           | Vomiting           | -0.07                           | -0.17                    | 0.04  | 0.19    |
|                           | Abdominal Cramps   | 0.14                            | 0.04                     | 0.24  | 0.01    |
| <b>Nausea</b>             | Tenesmus           | 0.14                            | 0.03                     | 0.24  | 0.01    |
|                           | Malaise/fatigue    | 0.43                            | 0.33                     | 0.52  | <0.001  |
|                           | Fecal Incontinence | 0.11                            | -0.01                    | 0.24  | 0.03    |
|                           | Fever              | 0.29                            | 0.20                     | 0.38  | <0.001  |
|                           | Vomiting           | 0.49                            | 0.40                     | 0.57  | <0.001  |
|                           | Abdominal Cramps   | 0.25                            | 0.14                     | 0.35  | <0.001  |
|                           | Gas                | 0.04                            | -0.07                    | 0.14  | 0.48    |
| <b>Tenesmus</b>           | Malaise/fatigue    | 0.23                            | 0.13                     | 0.32  | <0.001  |
|                           | Fecal Incontinence | -0.03                           | -0.12                    | 0.09  | 0.64    |
|                           | Fever              | 0.07                            | -0.04                    | 0.19  | 0.16    |
|                           | Vomiting           | 0.14                            | 0.03                     | 0.25  | 0.007   |
|                           | Abdominal Cramps   | 0.21                            | 0.11                     | 0.30  | <0.001  |
|                           | Gas                | 0.11                            | 0.002                    | 0.23  | 0.03    |
|                           | Nausea             | 0.14                            | 0.03                     | 0.24  | 0.01    |
| <b>Malaise/fatigue</b>    | Fecal Incontinence | 0.13                            | 0.03                     | 0.24  | 0.01    |
|                           | Fever              | 0.30                            | 0.21                     | 0.38  | <0.001  |
|                           | Vomiting           | 0.34                            | 0.25                     | 0.42  | <0.001  |
|                           | Abdominal Cramps   | 0.31                            | 0.22                     | 0.41  | <0.001  |
|                           | Gas                | 0.13                            | 0.03                     | 0.24  | 0.01    |
|                           | Nausea             | 0.43                            | 0.33                     | 0.52  | <0.001  |
|                           | Tenesmus           | 0.23                            | 0.13                     | 0.32  | <0.001  |
| <b>Fecal incontinence</b> | Fever              | 0.06                            | -0.06                    | 0.18  | 0.25    |
|                           | Vomiting           | 0.08                            | -0.03                    | 0.19  | 0.15    |
|                           | Abdominal Cramps   | 0.14                            | 0.04                     | 0.23  | 0.007   |
|                           | Gas                | 0.40                            | -0.06                    | 0.14  | 0.45    |
|                           | Nausea             | 0.11                            | -0.01                    | 0.24  | 0.03    |
|                           | Tenesmus           | -0.03                           | -0.12                    | 0.09  | 0.64    |
|                           | Malaise/fatigue    | 0.13                            | 0.03                     | 0.24  | 0.01    |

*Note.* Ordinal values of signs and symptoms: 0, none; 1, mild; 2, moderate; 3, severe

**Supplementary Table 4. Ordinal logistic regression analysis of the relationship between sign/symptom severity and impact on activity (TrEAT TD dataset)**

| Symptom                          | OR    | 95% CI for OR | p-value |
|----------------------------------|-------|---------------|---------|
| <b>Fever</b>                     |       |               |         |
| Mild                             | 4.30  | 1.86-9.91     | 0.001   |
| Moderate                         | 5.62  | 2.61-12.11    | <0.0001 |
| Severe                           | 3.87  | 2.61-12.11    | 0.02    |
| <b>Vomiting</b>                  |       |               |         |
| Mild                             | 5.42  | 2.24-13.14    | <0.0001 |
| Moderate                         | 5.34  | 2.29-12.45    | <0.0001 |
| Severe                           | 8.38  | 4.14-16.99    | <0.0001 |
| <b>Abdominal Cramps</b>          |       |               |         |
| Mild                             | 1.12  | 0.66-1.89     | 0.68    |
| Moderate                         | 2.76  | 1.65-4.63     | <0.0001 |
| Severe                           | 4.40  | 2.13-9.11     | <0.0001 |
| <b>Nausea</b>                    |       |               |         |
| Mild                             | 2.75  | 1.72-4.40     | <0.0001 |
| Moderate                         | 9.19  | 5.16-16.36    | <0.0001 |
| Severe                           | 37.07 | 11.78-116.66  | <0.0001 |
| <b>Gas</b>                       |       |               |         |
| Mild                             | 1.21  | 0.72-2.05     | 0.47    |
| Moderate                         | 1.72  | 1.04-2.86     | 0.06    |
| Severe                           | 1.78  | 0.63-5.01     | 0.27    |
| <b>Incontinence</b>              |       |               |         |
| Mild                             | 3.53  | 1.54-8.09     | 0.003   |
| Moderate                         | 2.62  | 1.19-5.76     | 0.02    |
| Severe                           | 10.80 | 2.82-41.43    | 0.001   |
| <b>Malaise</b>                   |       |               |         |
| Mild                             | 5.85  | 3.29-10.40    | <0.0001 |
| Moderate                         | 14.11 | 8.01-24.86    | <0.0001 |
| Severe                           | 44.29 | 18.48-106.17  | <0.0001 |
| <b>Tenesmus</b>                  |       |               |         |
| Mild                             | 1.29  | 0.74-2.24     | 0.37    |
| Moderate                         | 2.79  | 1.56-5.00     | 0.001   |
| Severe                           | 1.75  | 0.44-7.00     | 0.43    |
| <b>Max Loose Stools/24 hours</b> |       |               |         |
| 2-4 loose stools/24 hrs          | 1.19  | 1.13-1.25     | <0.0001 |
| 5-7 loose stools/24 hrs          | 3.85  | 2.37-6.24     | <0.0001 |
| ≥8 loose stools/24 hrs           | 8.51  | 4.96-14.59    | <0.0001 |

**Supplementary Table 5. Mean TD Score Across Disease Classification and Site (TrEAT TD dataset)**

| <b>Characteristic</b>                     | <b>Mean TD Score</b> | <b>SD</b> | <b>p-value</b> |
|-------------------------------------------|----------------------|-----------|----------------|
| <b>Disease Classification</b>             |                      |           |                |
| <b>Acute watery diarrhea</b>              | 3.90                 | 1.91      | <.0005         |
| <b>Acute dysentery or febrile illness</b> | 6.20                 | 2.07      |                |
| <b>Site</b>                               |                      |           |                |
| <b>Kenya-BATUK</b>                        | 3.61                 | 2.09      |                |
| <b>Honduras</b>                           | 4.52                 | 2.22      |                |
| <b>Thailand</b>                           | 6.40                 | 1.43      |                |
| <b>Camp Lemonnier – Djibouti</b>          | 4.00                 | 1.70      |                |
| <b>Camp Bastion – Afghanistan</b>         | 5.29                 | 1.97      |                |

Note: Site scores reflect TD syndrome type distribution (AWD vs. ADF). For example, enrollment at the Thailand site was restricted to ADF so higher TD scores were expected.

## Supplementary Figure 2. TD Disease Score by TrEAT TD Disease Classification and Site

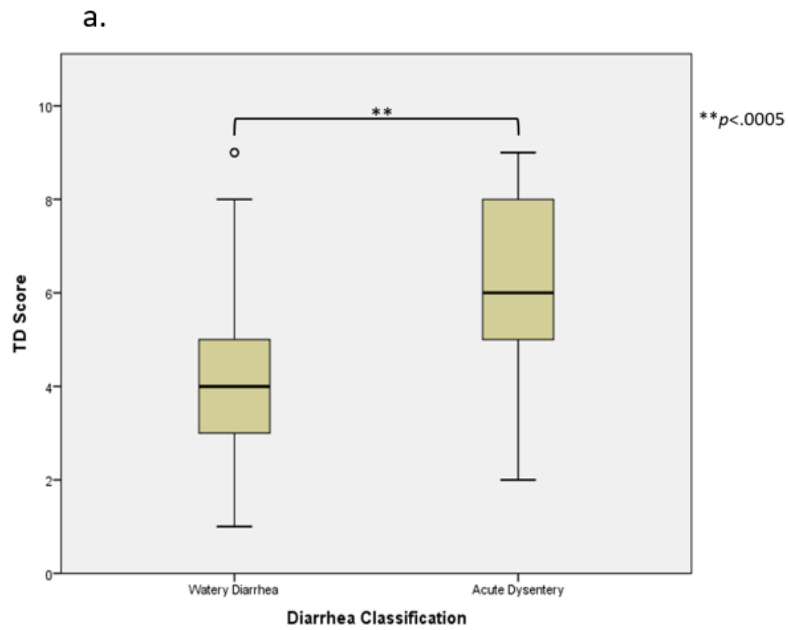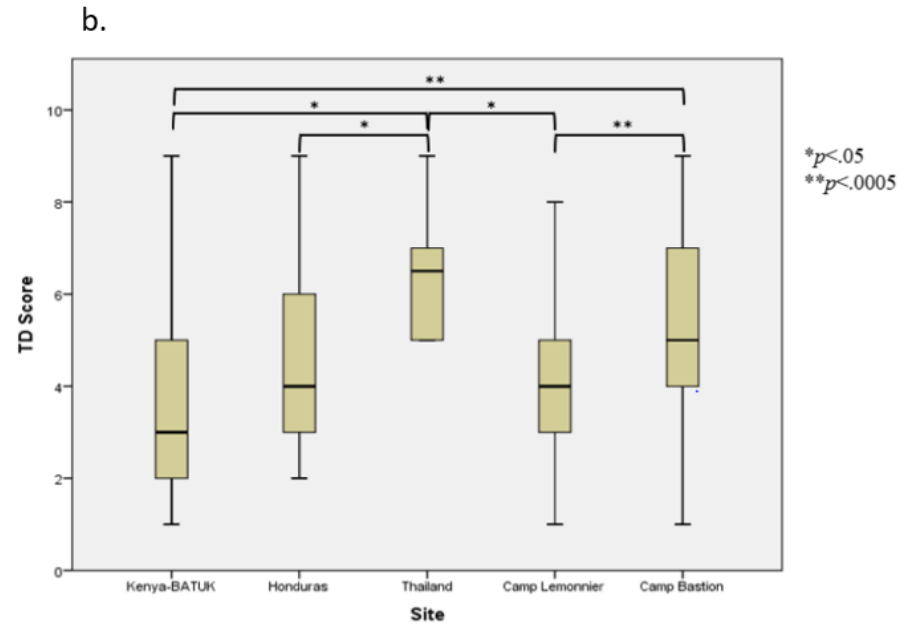

Note: Site scores reflect TD syndrome type distribution (AWD vs. ADF). For example, enrollment at the Thailand site was restricted to ADF so higher TD scores were expected.

Supplementary Figure 3. Ordinal logistic regression analysis of the relationship between Loose Stool Classification or TD Score and impact on activity (TrEAT TD dataset)

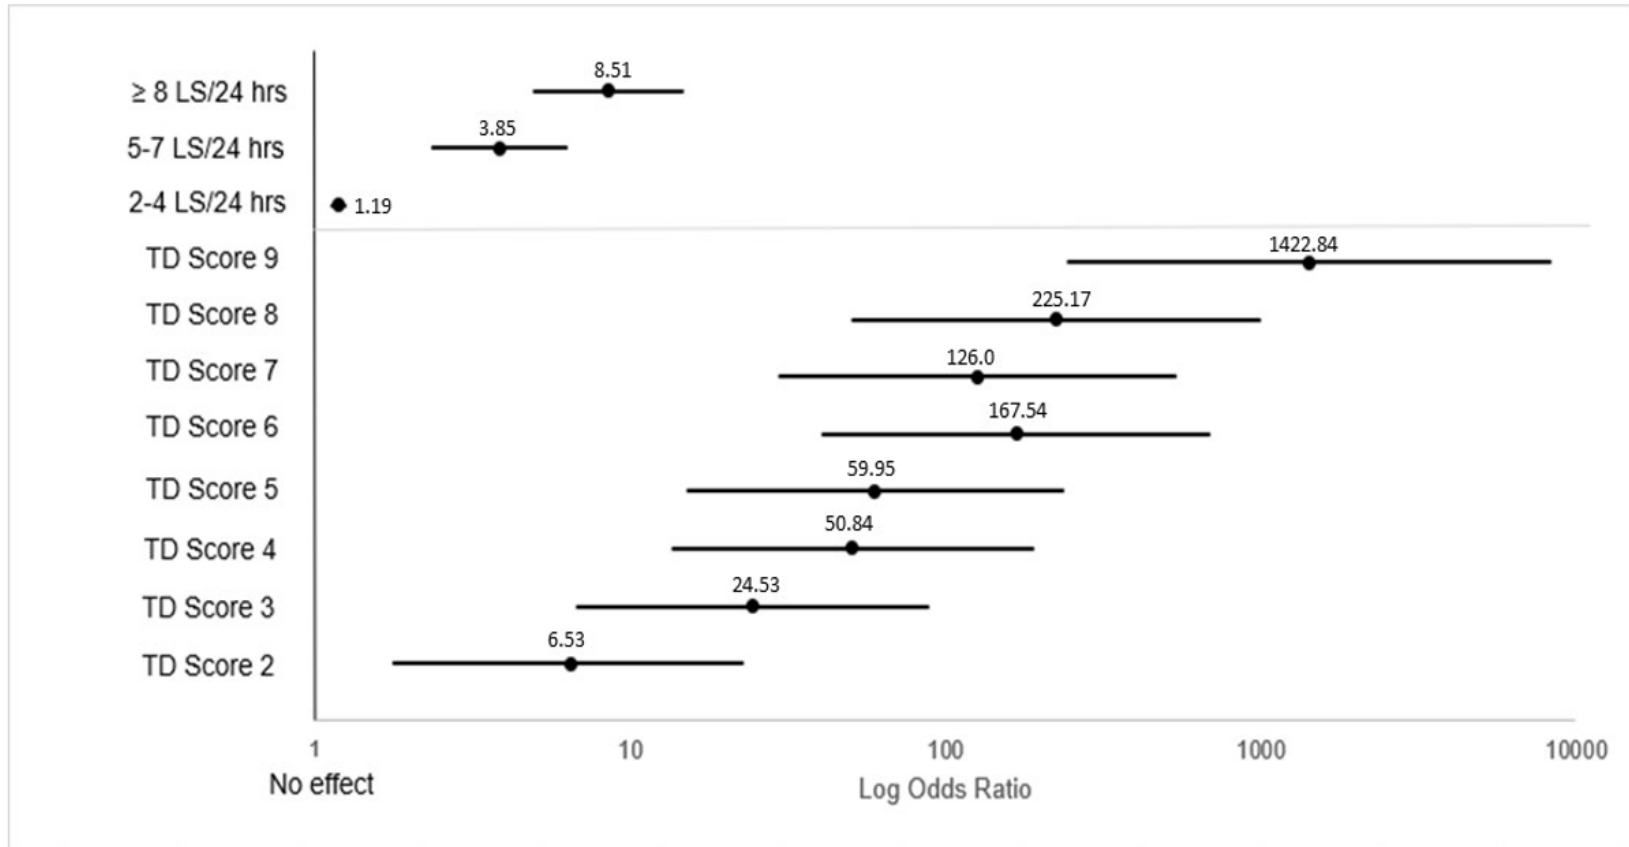

LS = Maximum # loose stools/24 hrs
